# Supplementary material for: Evaluating the psychometric properties of the Grit scale in Marine recruits using Rasch analysis
Source: HighWire-hosted journal article supplement (doi:10.1136/bmjmilitary-2021-001813), 2021-10-06
Supplement: bmjmilitary-2021-001813supp001_data_supplement.pdf [file bmjmilitary-2021-001813supp001_data_supplement.pdf]

**Online supplemental material, Appendix 1: Fit to the Rach model, per subscale**

|                          | Outfit MSQ | Infit MSQ |
|--------------------------|------------|-----------|
| Consistency of interests |            |           |
| Item 1                   | 1.041      | 1.024     |
| Item 3                   | 1.153      | 0.966     |
| Item 5                   | 0.789      | 0.838     |
| Item 7                   | 1.002      | 0.961     |
| Item 9                   | 0.745      | 0.848     |
| Perseverance of effort   |            |           |
| Item 2                   | 0.875      | 0.888     |
| Item 4                   | 1.017      | 1.041     |
| Item 6                   | 0.996      | 1.005     |
| Item 8                   | 0.757      | 0.808     |
| Item 10                  | 1.116      | 1.117     |

**Legend:** MSQ= Mean sum of squares. Infit and outfit statistics within the range of 0.5 - 1.5 indicate that an item effectively contributes to the latent construct the instrument purports to measure.
